# Supplementary material for: Enhanced photocatalytic ammonia synthesis over a Bi/carbon cloth float: triphase reaction system-assisted N2supply and photothermal co-activation
Source: Royal Society of Chemistry journal article supplement (doi:10.1039/d2gc02683j), 2022-01-01
Supplement: d2gc02683j1.pdf [file d2gc02683j1.pdf]

## Supporting Information

### **Enhanced photocatalytic ammonia synthesis over a Bi/carbon cloth float: triphasic reaction system assisted N<sub>2</sub> supply and photothermal co-activation**

Yaru Li,<sup>a</sup> Jianxin Liu,<sup>\*a</sup> Zijun Sun,<sup>a</sup> Rui Li,<sup>b</sup> Lijun Guo,<sup>a</sup> Xiaochao Zhang,<sup>a</sup> Yawen Wang,<sup>a</sup>  
Yunfang Wang,<sup>a</sup> Zhuobin Yu<sup>c</sup> and Caimei Fan<sup>\*a</sup>

<sup>a</sup>*College of Chemical Engineering and Technology, Taiyuan University of Technology, Taiyuan  
030024, PR China*

<sup>b</sup>*College of Environmental Science and Engineering, Taiyuan University of Technology, Taiyuan  
030024, PR China*

<sup>c</sup>*Instrumental Analysis Center, Taiyuan University of Technology, Taiyuan 030024, PR China*

*\*Correspondence to: liujx0519@163.com; fancm@163.com*

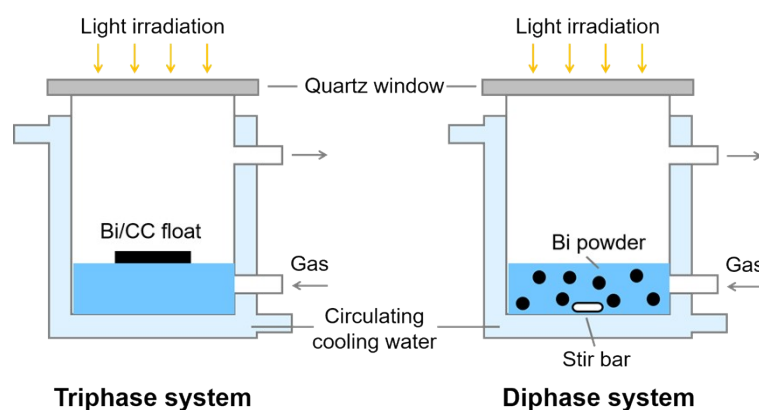

Fig. S1 The schematic diagrams of the photocatalytic NRR experiment performed in the triphase and diphase systems. The circulating cooling water is used when the controlled temperature condition is explored.

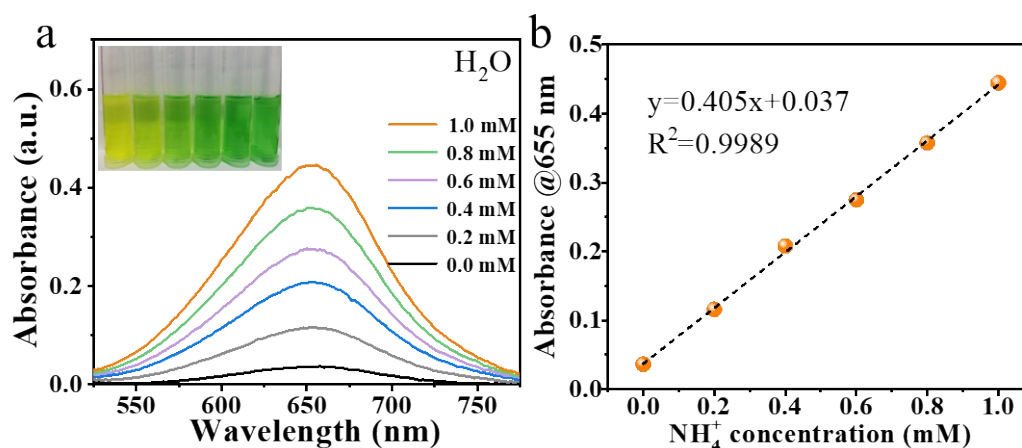

Fig. S2 (a) UV-Vis absorption spectra of indophenol assays with  $\text{NH}_4^+$  ions after incubated for 2 h at room temperature and (b) Calibration curve used for calculation of  $\text{NH}_4\text{Cl}$  concentrations in deionized water.

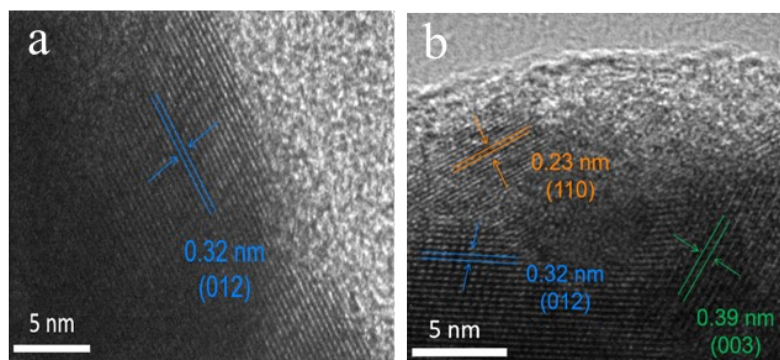

Fig. S3 The HRTEM images of (a) the solid sphere in *s*-Bi and (b) the hollow sphere in typical *h*-Bi2 samples.

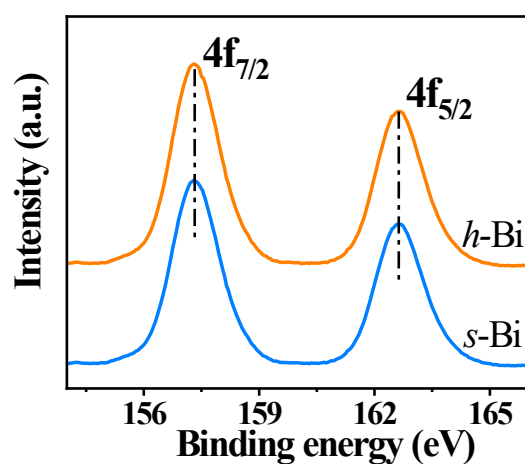

Fig. S4 High-resolution XPS spectra for Bi 4f of *s*-Bi and typical *h*-Bi2.

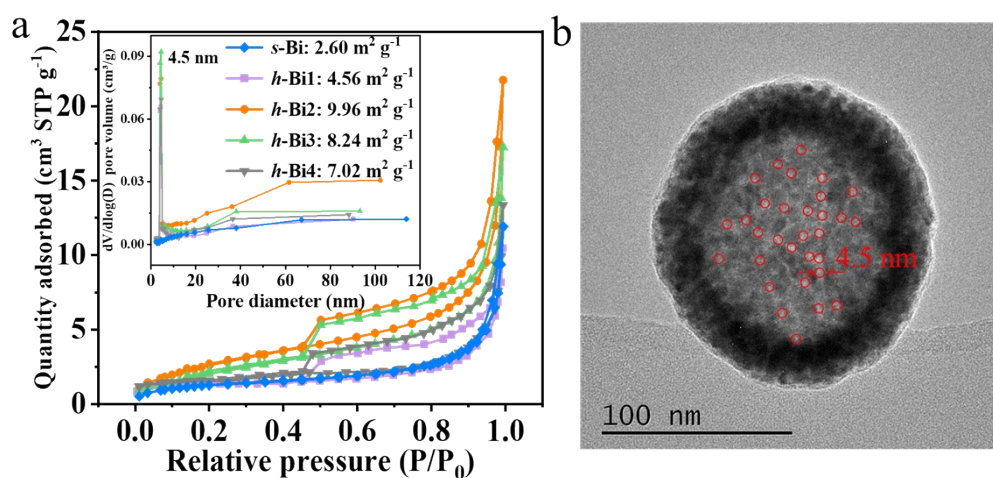

Fig. S5 (a) The N<sub>2</sub> adsorption-desorption isotherms and pore size distribution (inset) of all Bi samples, and (b) The HRTEM images of the hollow structure in *h*-Bi.

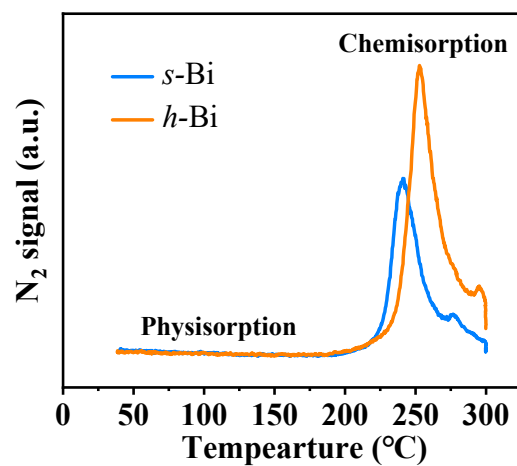

Fig. S6 The  $N_2$ -TPD spectra of *s*-Bi and typical *h*-Bi2.

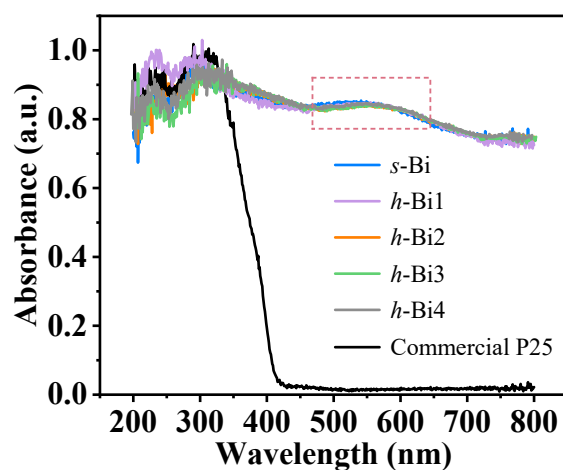

Fig. S7 The DRS spectra of all Bi samples and commercial P25 samples.

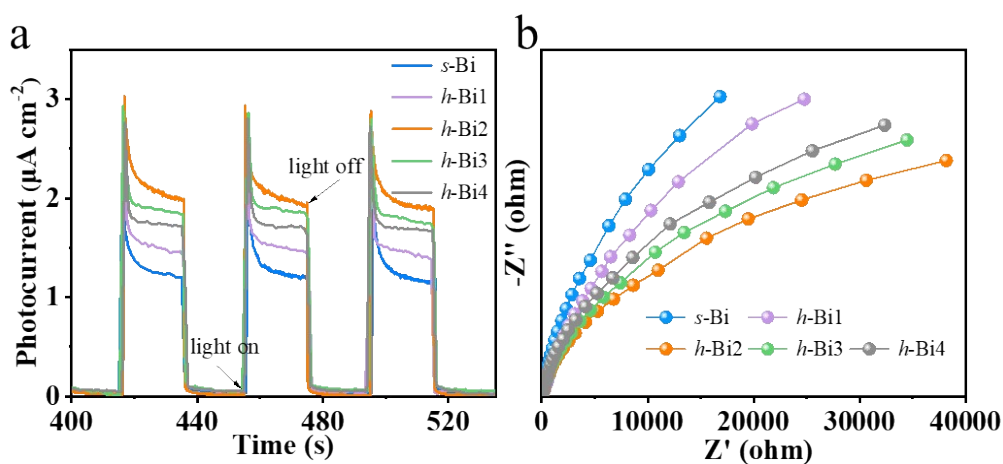

Fig. S8 (a) Photocurrent and (b) EIS spectra of all Bi samples coated on ITO substrate.

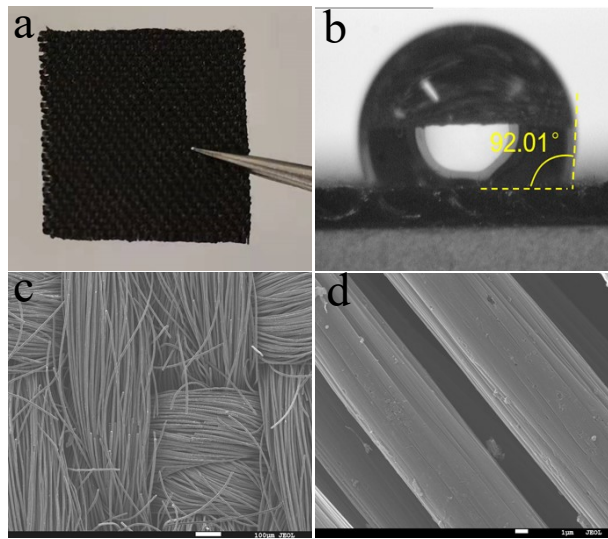

Fig. S9 (a) The photograph, (b) Water droplet, and (c) (d) SEM images of the hydrophilic carbon cloth (CC<sub>1</sub>, 2 cm×2 cm).

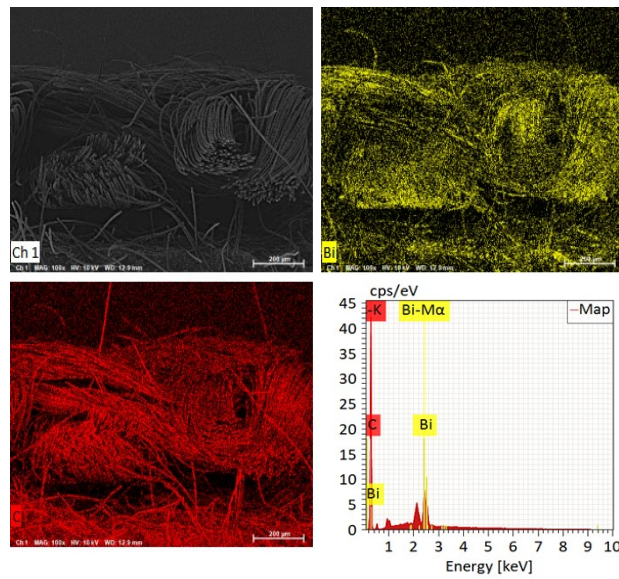

Fig. S10 SEM and related EDX mapping images of sectional view for Bi/hydrophilic carbon cloth (Bi/CC<sub>1</sub>) float.

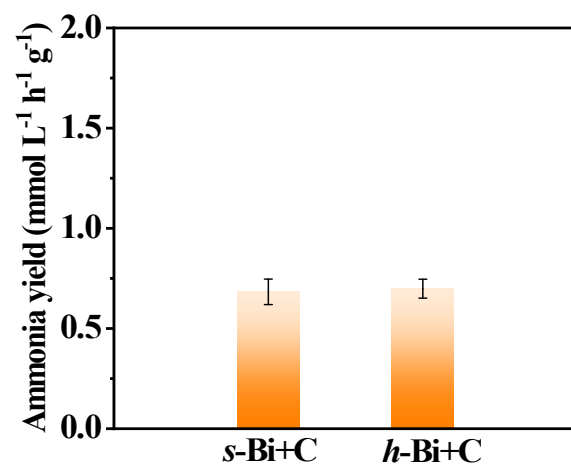

Fig. S11 The ammonia yields of *s*-Bi and typical *h*-Bi<sub>2</sub> mixed with C powders in diphase system.

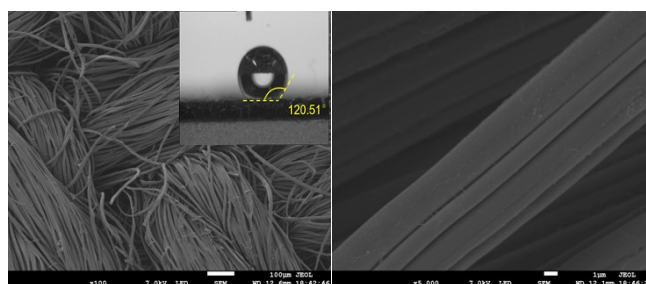

Fig. S12 SEM images and inset of the photograph of water droplet of the hydrophobic carbon cloth (CC<sub>b</sub>).

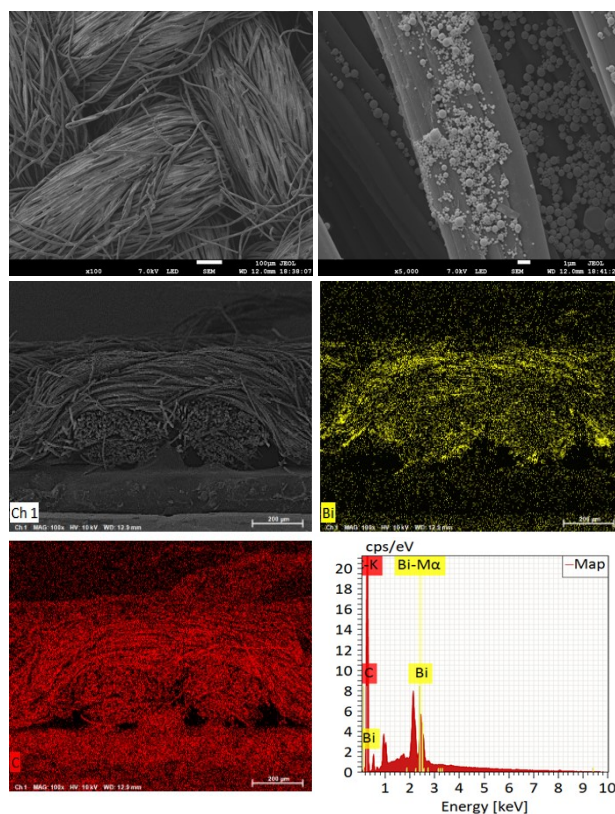

Fig. S13 SEM and related EDX mapping images of Bi/hydrophobic carbon cloth (Bi/CC<sub>b</sub>) float.

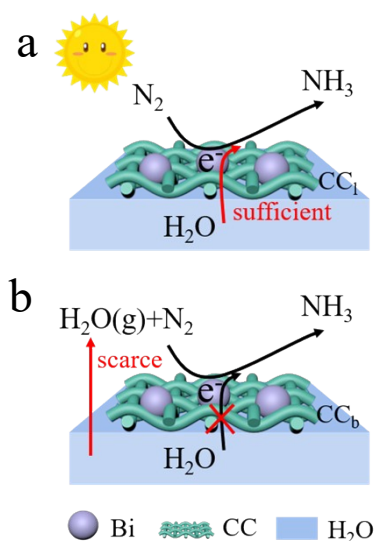

Fig. S14 Schematic H<sub>2</sub>O reactant supply diagrams of (a) Bi/CC<sub>1</sub> and (b) Bi/CC<sub>b</sub> float triphase systems, respectively. CC<sub>b</sub> and CC<sub>1</sub> represent hydrophobic and hydrophilic carbon cloth, respectively.

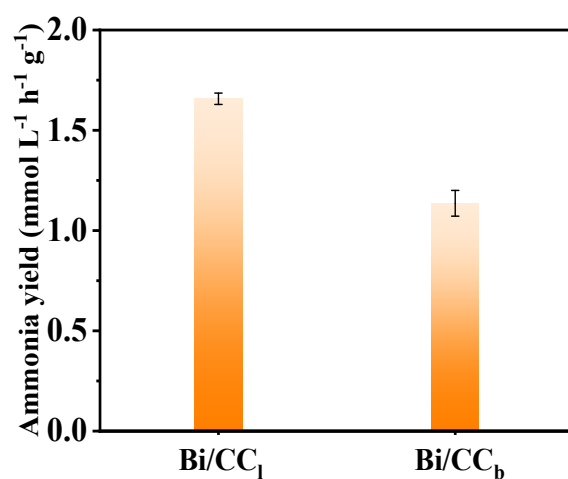

Fig. S15 Photocatalytic N<sub>2</sub> reduction to ammonia yield of Bi/CC<sub>1</sub> and Bi/CC<sub>b</sub>. CC<sub>b</sub> and CC<sub>1</sub> represent hydrophobic and hydrophilic carbon cloth, respectively.

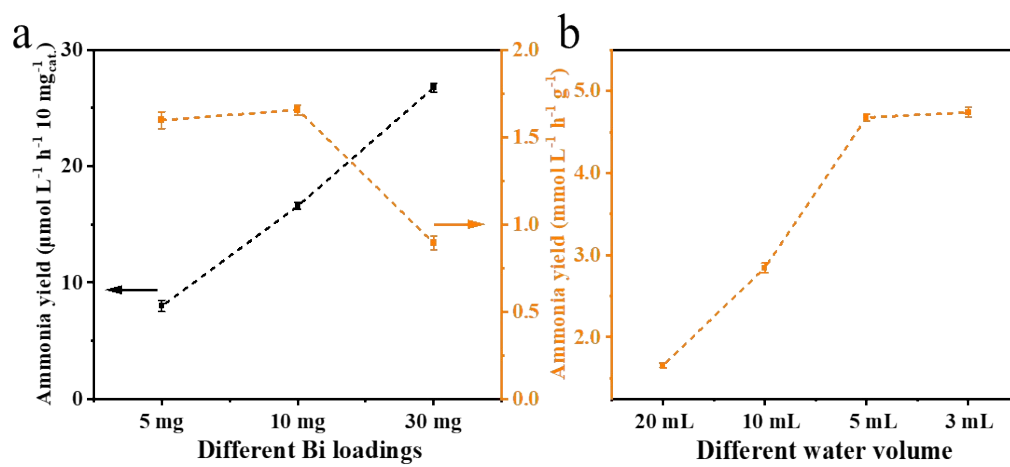

Fig. S16 The photocatalytic N<sub>2</sub> reduction to ammonia yield of Bi/CC float (a) with different Bi photocatalyst loadings and (b) deionized water volume.



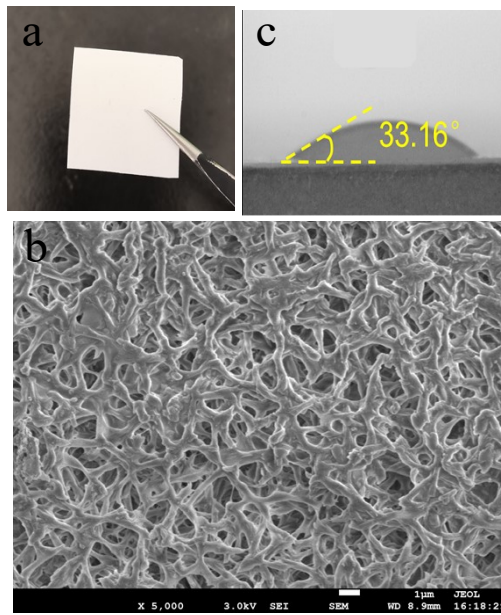

Fig. S17 (a) The photograph, (b) SEM, and (c) Water droplet images of the Nylon66 membrane ( $2\text{ cm} \times 2\text{ cm}$ ).

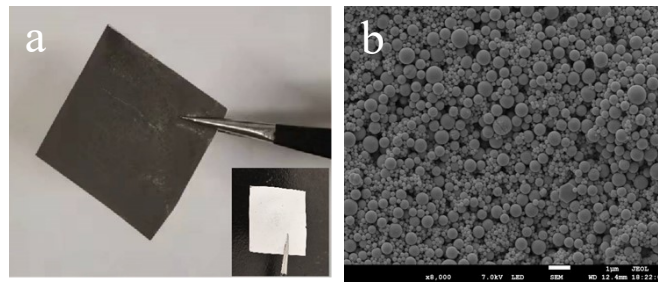

Fig. S18 (a) The photographs of the front and back (inset) views, (b) SEM images of the Bi/Nylon66 float ( $2\text{ cm} \times 2\text{ cm}$ ).

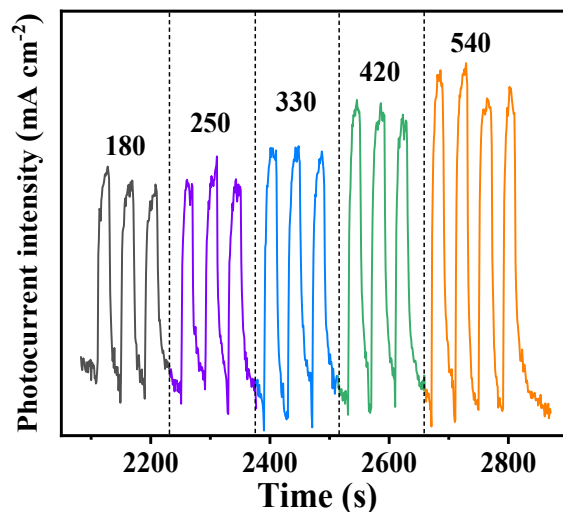

Fig. S19 The photocurrent spectrum of Bi under different photo intensity: 180, 250, 330, 420, and 540 mW cm<sup>-2</sup>, respectively.

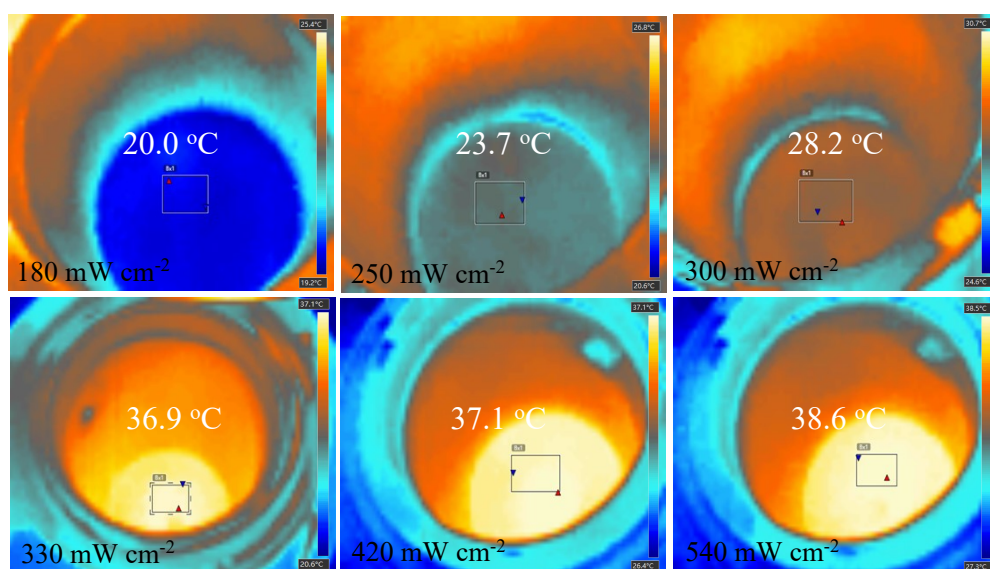

Fig. S20 The infrared imaging photographs of the powders diphas system with different photo intensity: 180, 250, 300, 330, 420, and 540 mW cm<sup>-2</sup>, respectively.

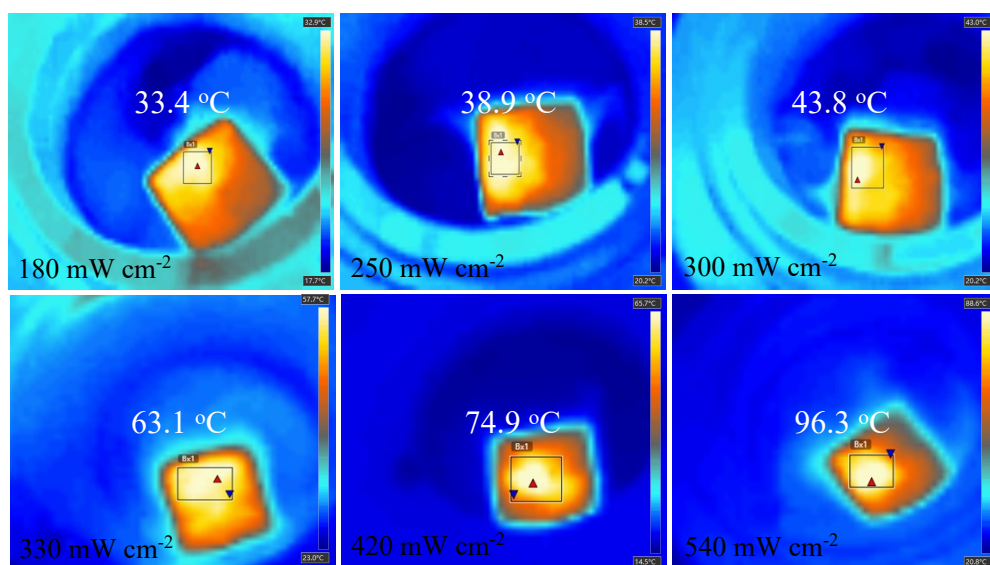

Fig. S21 The infrared imaging photographs and corresponding surface temperatures of the Bi/CC float triphase system under different photo intensity: 180, 250, 300, 330, 420, and 540  $\text{mW cm}^{-2}$ , respectively.

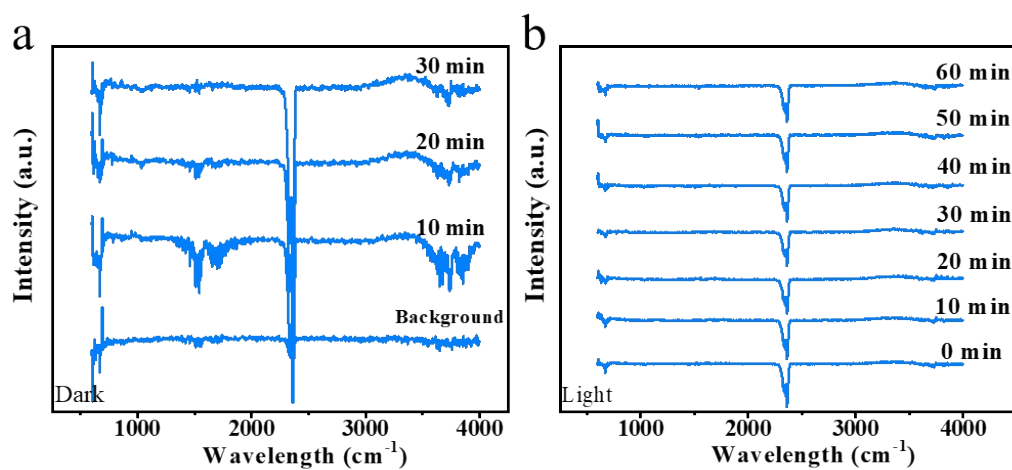

Fig. 22 The in-situ FTIR spectra recorded from CC sample in the (a) dark and (b) light conditions during the photocatalytic  $\text{N}_2$  reduction to ammonia progress.

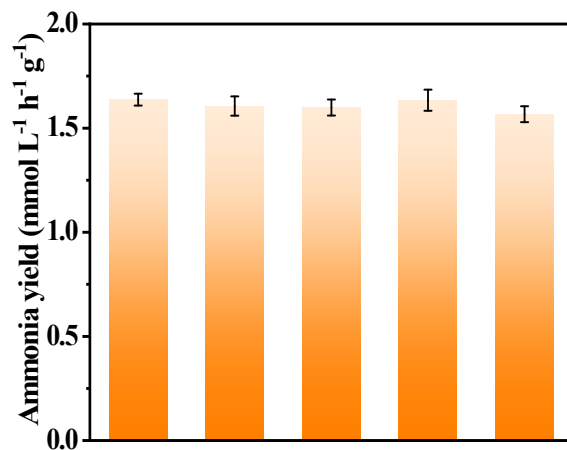

Fig. S23 The cycle tests of Bi/CC float triphase system for photocatalytic N<sub>2</sub> reduction to ammonia.

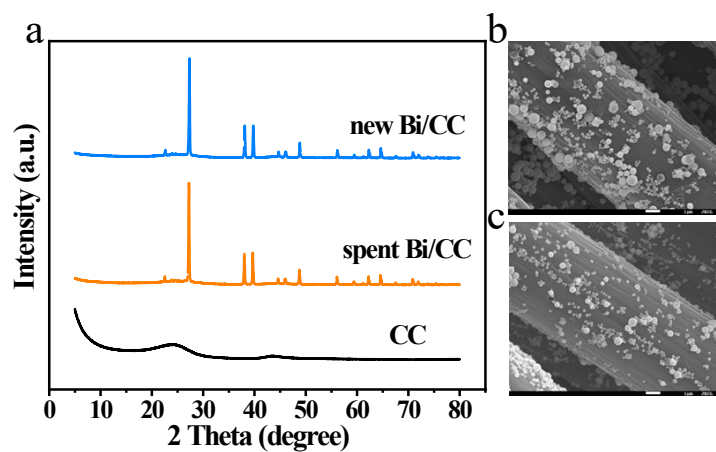

Fig. S24 (a) XRD spectra and correspondent SEM images of Bi/CC (b) before and (c) after five cycles PNRR reactions.

Table S1 The reported results for PNRR using water and nitrogen as feedstocks at ambient conditions.

| Catalysts                                                                    | Reaction systems | Light source: 300 W Xe lamp |                                        | Hole scavenger | NH <sub>3</sub> yield (mmol L <sup>-1</sup> h <sup>-1</sup> g <sup>-1</sup> ) | References |      |  |
|------------------------------------------------------------------------------|------------------|-----------------------------|----------------------------------------|----------------|-------------------------------------------------------------------------------|------------|------|--|
|                                                                              |                  | Wavelength (λ)              | Photo intensity (mW cm <sup>-2</sup> ) |                |                                                                               |            |      |  |
| <i>s</i> -Bi                                                                 | Liquid-Solid     | 320-780 nm                  | 330                                    | /              | 0.65                                                                          | This work  |      |  |
| <i>h</i> -Bi                                                                 |                  |                             |                                        |                | 0.70                                                                          |            |      |  |
| <i>s</i> -Bi/CC                                                              | 0.91             |                             |                                        |                |                                                                               |            |      |  |
| <i>h</i> -Bi/CC                                                              | Gas-Solid-Liquid |                             |                                        |                | 540                                                                           |            | 1.66 |  |
|                                                                              |                  |                             |                                        |                | Real sunlight                                                                 |            | 2.85 |  |
|                                                                              |                  |                             |                                        |                | Real sunlight                                                                 |            | 1.22 |  |
| BiOBr                                                                        | Liquid-Solid     | Full spectrum               | -                                      | /              | 0.06                                                                          | S1         |      |  |
| OVs-BiOBr                                                                    | Liquid-Solid     |                             |                                        |                | 0.55                                                                          |            |      |  |
| MOF-76(Ce)                                                                   | Liquid-Solid     | Full spectrum               | -                                      | /              | 0.34                                                                          | S2         |      |  |
| In <sub>2</sub> O <sub>3</sub> /In <sub>2</sub> S <sub>3</sub>               | Liquid-Solid     | Full spectrum               | 200                                    | /              | 0.40                                                                          | S3         |      |  |
| AgBr/Ag/Bi <sub>4</sub> O <sub>5</sub> Br <sub>2</sub>                       | Liquid-Solid     | Full spectrum               | -                                      | ethanol        | 0.18                                                                          | S4         |      |  |
| SiW <sub>9</sub> Co <sub>3</sub><br>/PDA/OVs-Bi <sub>2</sub> WO <sub>6</sub> | Liquid-Solid     | Simulated sunlight          | 400                                    | /              | 0.35                                                                          | S5         |      |  |
| OVs-TiO <sub>2</sub>                                                         | Liquid-Solid     | >420 nm                     | -                                      | methanol       | 0.46                                                                          | S6         |      |  |
| V <sub>0</sub> -S-rich TiO <sub>2-x</sub> S <sub>y</sub>                     | Liquid-Solid     | Full spectrum               | -                                      | /              | 1.90                                                                          | S7         |      |  |
| SVs-Bi <sub>2</sub> S <sub>3</sub>                                           | Liquid-Solid     | 200-1100 nm                 | 200                                    | /              | 0.51                                                                          | S8         |      |  |
| PCON                                                                         | Liquid-Solid     | >420 nm                     | -                                      | /              | 0.49                                                                          | S9         |      |  |

## References

- (S1) X. Xue, R. Chen, H. Chen, Y. Hu, Q. Ding, Z. Liu, L. Ma, G. Zhu, W. Zhang, Q. Yu, J. Liu, J. Ma and Z. Jin, *Nano Lett.*, 2018, **18**, 7372-7377.
- (S2) C. Zhang, Y. Xu, C. Lv, X. Zhou, Y. Wang, W. Xing, Q. Meng, Y. Kong and G. Chen, *ACS Appl. Mater. Interfaces*, 2019, **11**, 29917-29923.
- (S3) H. Xu, Y. Wang, X. Dong, N. Zheng, H. Ma and X. Zhang, *Appl. Catal. B- Environ.*, 2019, **257**, 117932.
- (S4) Y. Chen, C. Zhao, S. Ma, P. Xing, X. Hu, Y. Wu and Y. He, *Inorg. Chem. Front.*, 2019, **6**, 3083.
- (S5) T. Wang, J. Liu, P. Wu, C. Feng, D. Wang, H. Hu and G. Xue, *J. Mater. Chem. A*, 2020, **8**, 16590.

- (S6) Q. Liu, H. Wang, R. Tang, Q. Cheng and Y. Yuan, *ACS Appl. Nano Mater.*, 2021, **4**, 8674-8679.
- (S7) X. Xue, H. Chen, Y. Xiong, R. Chen, M. Jiang, G. Fu, Z. Xi, X. Zhang, J. Ma, W. Fang and Z. Jin, *ACS Appl. Mater. Interfaces*, 2021, **13**, 4975-4983.
- (S8) M. Lan, Y. Wang, X. Dong, F. Yang, N. Zheng, Y. Wang, H. Ma and X. Zhang, *Appl. Surf. Sci.*, 2022, **591**, 153205.
- (S9) S. Yang, X. Deng, P. Chen, T. Zhao, F. Liu, C. Deng and S. Yin, *Appl. Catal. B-Environ.*, 2022, 121370.
